# Supplementary material for: Reaching Natural Growth: Light Quality Effects on Plant Performance in Indoor Growth Facilities
Source: PubMed Central journal article supplement (PMC7599614; doi:10.3390/plants9101273), 2020-09-27
Supplement: plants-09-01273-s001.pdf [file plants-09-01273-s001.pdf]

Table S1: Raw average values by measured trial for each treatment and specie. Plus minus values standard errors of these.

| Species                                                                    | Alnus         |             |             |             |             | Ulmus         |             |             |             |             |
|----------------------------------------------------------------------------|---------------|-------------|-------------|-------------|-------------|---------------|-------------|-------------|-------------|-------------|
| Trial/Treatment                                                            | Outdoor trial | 6%B         | 25% B       | 35%B        | 62%B        | Outdoor trial | 6%B         | 25% B       | 35%B        | 62%B        |
| <b>Biomass and Morphology</b>                                              |               |             |             |             |             |               |             |             |             |             |
| Height (cm)                                                                | 22.32±1.2     | 20.2±0.21   | 10.45±0.82  | 11.62±2.28  | 8.53±1.5    | 31.18±3.44    | 48.51±2.7   | 45.35±2.38  | 48.95±2.89  | 31.19±2.55  |
| Dry weight leaves (g)                                                      | 1.06±0.1      | 0.5±0.05    | 0.27±0.04   | 0.33±0.11   | 0.32±0.07   | 1.33±0.28     | 2.66±0.32   | 2.75±0.26   | 2.85±0.29   | 1.52±0.25   |
| Dry weight shoot (g)                                                       | 0.51±0.05     | 0.22±0.03   | 0.13±0.02   | 0.15±0.05   | 0.12±0.02   | 0.66±0.16     | 1.69±0.23   | 1.71±0.19   | 1.79±0.23   | 0.79±0.16   |
| Dry weight roots (g)                                                       | 0.52±0.05     | 0.58±0.07   | 0.17±0.03   | 0.17±0.05   | 0.3±0.06    | 0.55±0.13     | 1.98±0.24   | 2.5±0.28    | 2.4±0.33    | 1.45±0.36   |
| Total dry weight (g)                                                       | 2.09±0.19     | 1.3±0.13    | 0.57±0.09   | 0.64±0.2    | 0.74±0.15   | 2.54±0.56     | 6.34±0.77   | 6.96±0.66   | 7.05±0.82   | 3.76±0.75   |
| Root to Shoot ratio                                                        | 0.34±0.03     | 0.8±0.07    | 0.42±0.05   | 0.44±0.04   | 0.68±0.01   | 0.27±0.02     | 0.46±0.02   | 0.57±0.05   | 0.5±0.04    | 0.55±0.07   |
| SLA (m <sup>2</sup> kg <sup>-1</sup> )                                     | 34.76±1.24    | 36.41±2.99  | 33.61±0.99  | 35.49±2.45  | 31.67±1.18  | 28.35±0.85    | 28.45±0.79  | 23.08±0.62  | 24.23±0.92  | 25.05±0.78  |
| <b>Chlorophyll</b>                                                         |               |             |             |             |             |               |             |             |             |             |
| Chlorophyll a (mg g <sup>-1</sup> )                                        | 7.35±0.97     | 4.58±0.37   | 4.62±0.35   | 6.88±0.74   | 6.93±0.46   | 6.8±0.43      | 3.18±0.39   | 3.28±0.63   | 2.06±0.34   | 4.1±0.31    |
| Chlorophyll b (mg g <sup>-1</sup> )                                        | 1.45±0.25     | 1.02±0.11   | 1±0.07      | 1.49±0.15   | 1.45±0.11   | 1.54±0.09     | 0.71±0.09   | 0.74±0.15   | 0.45±0.07   | 0.88±0.09   |
| Chl a: b ratio                                                             | 1.94±0.18     | 1.68±0.04   | 1.99±0.18   | 2.9±0.21    | 2.56±0.11   | 1.15±0.09     | 0.98±0.09   | 1.06±0.17   | 0.72±0.11   | 1.11±0.08   |
| Carotenoids (mg g <sup>-1</sup> )                                          | 5.12±0.23     | 4.55±0.1    | 4.61±0.09   | 4.6±0.07    | 4.79±0.09   | 4.42±0.05     | 4.53±0.09   | 4.48±0.14   | 4.44±0.17   | 4.7±0.13    |
| Fv/Fm                                                                      | 0.78±0.01     | 0.74±0.01   | 0.77±0.01   | 0.76±0.02   | 0.8±0       | 0.81±0        | 0.73±0.02   | 0.77±0.01   | 0.78±0.01   | 0.79±0.01   |
| <b>Standardized light</b>                                                  |               |             |             |             |             |               |             |             |             |             |
| Max photosynthesis (CO <sub>2</sub> μmol m <sup>-2</sup> s <sup>-1</sup> ) | 14.35±1.48    | 10.22±1.52  | 6.78±1.05   | 11.6±1.33   | 12.31±1.21  | 12.87±1.9     | 9.01±0.68   | 11.82±0.36  | 11.51±0.5   | 12.68±0.95  |
| Initial slope                                                              | 0.044±0.001   | 0.037±0.002 | 0.026±0.004 | 0.038±0.004 | 0.041±0.005 | 0.045±0.002   | 0.043±0.003 | 0.042±0.002 | 0.04±0.001  | 0.05±0.006  |
| Dark respiration (CO <sub>2</sub> μmol m <sup>-2</sup> s <sup>-1</sup> )   | -1.05±0.15    | -0.86±0.2   | -1.09±0.13  | -1.59±0.16  | -1.39±0.27  | -1.33±0.22    | -1.46±0.26  | -1.13±0.14  | -1.1±0.19   | -1.83±0.39  |
| Compensation point (PPFD μmol m <sup>-2</sup> s <sup>-1</sup> )            | 22.67±4.33    | 21.67±3.76  | 41.33±4.29  | 38.67±2.33  | 29±2.65     | 24.33±2.85    | 25.83±3.76  | 25.5±2.64   | 25±3.46     | 28.17±1.38  |
| <b>In-situ' light</b>                                                      |               |             |             |             |             |               |             |             |             |             |
| Max photosynthesis (CO <sub>2</sub> μmol m <sup>-2</sup> s <sup>-1</sup> ) | 8.37±0.29     | 10.97±0.66  | 9.81±1.48   | 9.03±1.57   | 8.86±3.41   | 7.3±0.39      | 7.21±0.89   | 11.47±0.99  | 9.6±0.76    | 5.53±1.23   |
| Initial slope                                                              | 0.044±0.002   | 0.048±0.009 | 0.054±0.006 | 0.049±0.004 | 0.039±0.008 | 0.034±0.002   | 0.048±0.004 | 0.055±0.003 | 0.052±0.003 | 0.034±0.005 |
| Dark respiration (CO <sub>2</sub> μmol m <sup>-2</sup> s <sup>-1</sup> )   | -1.74±0.07    | -1.54±0.37  | -1.58±0.24  | -1.45±0.21  | -1.13±0.32  | -1.27±0.15    | -1.16±0.13  | -1.3±0.12   | -1.33±0.15  | -1.11±0.23  |
| Compensation point (PPFD μmol m <sup>-2</sup> s <sup>-1</sup> )            | 30.33±2.67    | 37.67±19.19 | 26.67±4.17  | 26.67±4.67  | 26.33±3.38  | 30.33±0.88    | 18.83±1.19  | 20.83±1.92  | 22.83±2.98  | 24.67±3.21  |
| Species                                                                    | Ocimum        |             |             |             |             | Lactuca       |             |             |             |             |
| Trial/Treatment                                                            | Outdoor       | 6%B         | 25% B       | 35%B        | 62%B        | Outdoor       | 6%B         | 25% B       | 35%B        | 62%B        |

|                                                                            | trial       |             |             |             |             | trial       |             |             |             |             |
|----------------------------------------------------------------------------|-------------|-------------|-------------|-------------|-------------|-------------|-------------|-------------|-------------|-------------|
| <b>Biomass and Morphology</b>                                              |             |             |             |             |             |             |             |             |             |             |
| Height (cm)                                                                | 21.17±1.38  | 30.42±0.89  | 26.09±0.79  | 28.15±1.48  | 23.99±1.03  | -           | -           | -           | -           | -           |
| Dry weight leaves (g)                                                      | 1.18±0.15   | 2.32±0.15   | 2.03±0.13   | 2.12±0.18   | 1.72±0.14   | 8.97±0.49   | 8.98±0.55   | 10.01±0.53  | 10.17±0.47  | 10.42±0.49  |
| Dry weight shoot (g)                                                       | 0.37±0.04   | 0.78±0.06   | 0.62±0.04   | 0.75±0.07   | 0.51±0.05   | -           | -           | -           | -           | -           |
| Dry weight roots (g)                                                       | 0.36±0.06   | 1.93±0.28   | 1.02±0.14   | 0.98±0.11   | 1.24±0.24   | 3.21±0.3    | 10.65±1.11  | 9.33±1.46   | 9.37±1.36   | 11.5±1.18   |
| Total dry weight (g)                                                       | 1.91±0.23   | 5.03±0.31   | 3.67±0.27   | 3.85±0.33   | 3.47±0.3    | 12.18±0.77  | 19.64±1.53  | 19.34±1.83  | 19.54±1.72  | 21.91±1.43  |
| Root to Shoot ratio                                                        | 0.24±0.02   | 0.7±0.12    | 0.37±0.04   | 0.34±0.03   | 0.63±0.14   | 0.35±0.02   | 1.18±0.08   | 0.9±0.12    | 0.88±0.11   | 1.1±0.11    |
| SLA (m <sup>2</sup> kg <sup>-1</sup> )                                     | 20.7±1.32   | 13.86±0.77  | 18.09±0.84  | 17.09±0.85  | 19.56±0.74  | 25.07±1.5   | 39.57±2.23  | 33.26±1.94  | 24.45±1.38  | 32.23±1.03  |
| <b>Chlorophyll</b>                                                         |             |             |             |             |             |             |             |             |             |             |
| Chlorophyll a (mg g <sup>-1</sup> )                                        | 2.19±0.29   | 2.33±0.14   | 3.51±0.2    | 2.99±0.26   | 4.29±0.37   | 2.51±0.53   | 2.06±0.24   | 2.84±0.42   | 1.8±0.13    | 3.99±0.51   |
| Chlorophyll b (mg g <sup>-1</sup> )                                        | 0.54±0.08   | 0.49±0.03   | 0.74±0.05   | 0.7±0.08    | 0.93±0.09   | 0.57±0.12   | 0.35±0.04   | 0.5±0.08    | 0.33±0.02   | 0.71±0.09   |
| Chl a: b ratio                                                             | 0.55±0.08   | 0.66±0.05   | 0.96±0.04   | 0.77±0.04   | 1.09±0.1    | 0.68±0.14   | 0.99±0.05   | 1.05±0.13   | 0.73±0.05   | 1.43±0.15   |
| Carotenoids (mg g <sup>-1</sup> )                                          | 4.08±0.05   | 4.8±0.19    | 4.81±0.08   | 4.39±0.15   | 4.62±0.06   | 4.38±0.33   | 5.93±0.16   | 5.84±0.19   | 5.46±0.09   | 5.62±0.2    |
| Fv/Fm                                                                      | 0.77±0.02   | 0.83±0.01   | 0.82±0      | 0.84±0      | 0.84±0      | 0.85±0.01   | 0.8±0.01    | 0.84±0.01   | 0.84±0.01   | 0.84±0.01   |
| <b>Standardized light</b>                                                  |             |             |             |             |             |             |             |             |             |             |
| Max photosynthesis (CO <sub>2</sub> μmol m <sup>-2</sup> s <sup>-1</sup> ) | 10.18±2.77  | 19.17±0.95  | 20.43±1.1   | 22.52±0.49  | 23.13±1     | 4.63±0.99   | 14.62±1.6   | 11.99±1.87  | 17.28±2.34  | 17.67±3.01  |
| Initial slope                                                              | 0.043±0.002 | 0.047±0.003 | 0.044±0.003 | 0.045±0.001 | 0.053±0.001 | 0.043±0.003 | 0.045±0.004 | 0.042±0.004 | 0.044±0.003 | 0.052±0.004 |
| Dark respiration (CO <sub>2</sub> μmol m <sup>-2</sup> s <sup>-1</sup> )   | -3.99±0.29  | -2.44±0.23  | -2.02±0.13  | -1.99±0.12  | -2.11±0.06  | -1.12±0.15  | -1.99±0.22  | -1.68±0.18  | -1.96±0.22  | -2.29±0.27  |
| Compensation point (PPFD μmol m <sup>-2</sup> s <sup>-1</sup> )            | 91.33±3.84  | 49±5.22     | 45.5±4.43   | 42.5±1.65   | 36.17±2.14  | 16±2.08     | 41±4.15     | 40.33±7.82  | 41.5±4.93   | 38.67±3.03  |
| <b>In-situ' light</b>                                                      |             |             |             |             |             |             |             |             |             |             |
| Max photosynthesis (CO <sub>2</sub> μmol m <sup>-2</sup> s <sup>-1</sup> ) | 6.73±0.3    | 13.78±0.92  | 17.65±1.42  | 17.24±0.98  | 16±1.07     | 5.77±0.65   | 7.11±1.67   | 10.48±1.59  | 12.08±1.5   | 8.49±2.04   |
| Initial slope                                                              | 0.037±0.001 | 0.059±0.003 | 0.059±0.004 | 0.061±0.003 | 0.057±0.003 | 0.038±0.002 | 0.045±0.007 | 0.053±0.003 | 0.055±0.002 | 0.047±0.005 |
| Dark respiration (CO <sub>2</sub> μmol m <sup>-2</sup> s <sup>-1</sup> )   | -2.8±0.21   | -1.78±0.14  | -1.98±0.23  | -1.95±0.26  | -2.1±0.11   | -1.85±0.17  | -1.33±0.25  | -1.56±0.19  | -1.81±0.12  | -1.56±0.22  |
| Compensation point (PPFD μmol m <sup>-2</sup> s <sup>-1</sup> )            | 76.33±3.38  | 28.17±2.61  | 33±4.38     | 31.67±5.63  | 34.67±3.33  | 38.33±6.12  | 23.67±3.29  | 27.83±4.61  | 30.83±2.43  | 24.5±3.27   |

Table S1 (continuation): Raw average values by measured trial for each treatment and specie. Plus minus values standard errors of these

| Species | Melissa | Raphanus |
|---------|---------|----------|
|---------|---------|----------|

| <b>Trial\Treatment</b>                                                   | <b>Outdoor trial</b> | <b>6%B</b>  | <b>25% B</b> | <b>35%B</b> | <b>62%B</b> | <b>Outdoor trial</b> | <b>6%B</b>  | <b>25% B</b> | <b>35%B</b> | <b>62%B</b> |
|--------------------------------------------------------------------------|----------------------|-------------|--------------|-------------|-------------|----------------------|-------------|--------------|-------------|-------------|
| <b>Biomass and Morphology</b>                                            |                      |             |              |             |             |                      |             |              |             |             |
| Height (cm)                                                              | 26.75±0.76           | 22.05±1.38  | 17.51±1.58   | 23.48±0.5   | 10.97±0.59  | 5.84±0.19            | 8.62±0.56   | 6.41±0.24    | 6.73±0.61   | 5.43±0.41   |
| Dry weight leaves (g)                                                    | 2.93±0.48            | 2.85±0.39   | 2.91±0.43    | 3.27±0.25   | 1.58±0.13   | 2.35±0.18            | 1.88±0.15   | 1.86±0.15    | 1.61±0.13   | 1.46±0.09   |
| Dry weight shoot (g)                                                     | =                    | =           | =            | =           | =           | 0.53±0.06            | 0.6±0.07    | 0.51±0.04    | 0.57±0.08   | 0.35±0.03   |
| Dry weight roots (g)                                                     | 1.73±0.33            | 1.92±0.28   | 1.82±0.23    | 1.94±0.19   | 1.11±0.13   | 4.41±0.51            | 4.97±0.24   | 6.14±0.74    | 5.13±0.44   | 3.3±0.15    |
| Total dry weight (g)                                                     | 4.67±0.81            | 4.77±0.65   | 4.73±0.63    | 5.21±0.43   | 2.69±0.25   | 7.3±0.67             | 7.46±0.41   | 8.52±0.87    | 7.31±0.56   | 5.12±0.18   |
| Root to Shoot ratio                                                      | 0.58±0.03            | 0.68±0.05   | 0.72±0.07    | 0.59±0.03   | 0.7±0.05    | 1.52±0.13            | 2.16±0.13   | 2.56±0.22    | 2.44±0.17   | 1.92±0.13   |
| SLA (m <sup>2</sup> kg <sup>-1</sup> )                                   | 38.1±2.97            | 31.28±1.6   | 29.08±0.91   | 31.64±1.49  | 35.73±1.02  | 23.71±0.98           | 27.15±0.99  | 31.13±2.12   | 30.57±0.97  | 27.43±0.77  |
| <b>Chlorophyll</b>                                                       |                      |             |              |             |             |                      |             |              |             |             |
| Chlorophyll a (mg g <sup>-1</sup> )                                      | 8.04±1.54            | 5.57±0.65   | 4.58±0.7     | 5.27±0.39   | 6.76±0.29   | 2.72±0.8             | 3.24±0.29   | 5.08±0.71    | 3.48±0.39   | 4.84±0.51   |
| Chlorophyll b (mg g <sup>-1</sup> )                                      | 1.82±0.3             | 1.31±0.15   | 1.03±0.15    | 1.22±0.09   | 1.54±0.1    | 0.67±0.16            | 0.74±0.06   | 1.17±0.15    | 0.79±0.08   | 1.16±0.07   |
| Chl a: b ratio                                                           | 1.94±0.39            | 1.79±0.15   | 1.5±0.21     | 1.71±0.1    | 2.07±0.04   | 0.63±0.18            | 1.09±0.06   | 1.49±0.19    | 1.2±0.12    | 1.55±0.08   |
| Carotenoids (mg g <sup>-1</sup> )                                        | 4.35±0.18            | 4.25±0.05   | 4.43±0.04    | 4.31±0.05   | 4.43±0.1    | 3.92±0.24            | 4.35±0.1    | 4.32±0.14    | 4.43±0.16   | 4.13±0.25   |
| Fv/Fm                                                                    | 0.81±0.01            | 0.78±0.02   | 0.82±0       | 0.78±0.01   | 0.82±0      | 0.83±0.01            | 0.82±0.01   | 0.83±0.01    | 0.82±0.01   | 0.83±0.01   |
| <b>Standardized light</b>                                                |                      |             |              |             |             |                      |             |              |             |             |
| Max photosynthesis (PPFD μmol m <sup>-2</sup> s <sup>-1</sup> )          | 19.11±2.88           | 13.64±1.24  | 17.2±0.81    | 15.78±1.59  | 15.96±1.07  | 10.31±1.25           | 24.72±1.12  | 18.19±1.52   | 22.66±1.72  | 24.02±2.44  |
| Initial slope                                                            | 0.054±0.004          | 0.041±0.003 | 0.048±0.002  | 0.04±0.003  | 0.051±0.006 | 0.053±0.002          | 0.053±0.002 | 0.057±0.004  | 0.052±0.002 | 0.062±0.005 |
| Dark respiration (CO <sub>2</sub> μmol m <sup>-2</sup> s <sup>-1</sup> ) | -1.08±0.08           | -1.21±0.2   | -1.4±0.17    | -1.42±0.11  | -2.11±0.56  | -1.23±0.11           | -2.19±0.15  | -1.63±0.24   | -1.85±0.14  | -2.36±0.23  |
| Compensation point (PPFD μmol m <sup>-2</sup> s <sup>-1</sup> )          | 18.33±0.88           | 26±3.81     | 27.67±3.7    | 33.67±2.03  | 35±4.23     | 20.33±2.85           | 40.67±3.22  | 26.67±5.3    | 34.83±2.68  | 35.17±3.05  |
| <b>In-situ' light</b>                                                    |                      |             |              |             |             |                      |             |              |             |             |
| Max photosynthesis (PPFD μmol m <sup>-2</sup> s <sup>-1</sup> )          | 11.08±0.33           | 12.34±1.87  | 14.29±0.9    | 16.26±0.86  | 11.88±1.54  | 13.77±1.97           | 12.57±2.16  | 14.81±2.41   | 14.59±1.14  | 11.46±1.51  |
| Initial slope                                                            | 0.051±0.004          | 0.064±0.003 | 0.067±0.002  | 0.06±0.004  | 0.056±0.003 | 0.046±0.003          | 0.069±0.004 | 0.068±0.003  | 0.069±0.002 | 0.055±0.005 |
| Dark respiration (CO <sub>2</sub> μmol m <sup>-2</sup> s <sup>-1</sup> ) | -1.63±0.09           | -1.47±0.14  | -1.51±0.14   | -1.6±0.11   | -1.79±0.16  | -1.05±0.01           | -1.64±0.1   | -1.53±0.32   | -1.56±0.16  | -1.57±0.14  |
| Compensation point (PPFD μmol m <sup>-2</sup> s <sup>-1</sup> )          | 24.33±1.2            | 20.5±2.19   | 21±2.8       | 26±3.49     | 26.5±3.27   | 22.33±1.33           | 20.67±1.38  | 21±4.77      | 21.5±2.38   | 25.17±6.28  |

Table S1 (continuation): Raw average values by measured trial for each treatment and specie. Plus minus values standard errors of these

| <b>Species</b>         | <b>Triticum</b> |            |              |             |             |
|------------------------|-----------------|------------|--------------|-------------|-------------|
| <b>Trial\Treatment</b> | <b>Outdoor</b>  | <b>6%B</b> | <b>25% B</b> | <b>35%B</b> | <b>62%B</b> |

| <u>trial</u>                                                               |             |             |             |             |             |
|----------------------------------------------------------------------------|-------------|-------------|-------------|-------------|-------------|
| <b>Biomass and Morphology</b>                                              |             |             |             |             |             |
| Height(cm)                                                                 | 52.41±1.37  | 51.9±0.98   | 45.73±2.73  | 46.78±0.63  | 39.27±1.19  |
| Dry weight leaves (g)                                                      | 12.26±0.46  | 10.45±0.36  | 9.92±0.44   | 8.74±0.56   | 6.8±0.37    |
| Dry weight shoot (g)                                                       | =           | =           | -           | -           | -           |
| Dry weight roots (g)                                                       | 21.04±2.43  | 81.74±7.21  | 82.1±8.96   | 56.6±5.24   | 93.12±6.46  |
| Total dry weight (g)                                                       | 33.3±2.34   | 92.19±7.36  | 92.02±8.77  | 65.34±5.38  | 99.91±6.53  |
| Root to Shoot ratio                                                        | 1.76±0.25   | 7.78±0.62   | 8.82±1.2    | 6.79±0.7    | 14.21±1.13  |
| SLA (m <sup>2</sup> kg <sup>-1</sup> )                                     | 31.45±0.67  | 20.07±0.63  | 24.92±1.94  | 26.93±1.49  | 24.14±0.81  |
| <b>Chlorophyll</b>                                                         |             |             |             |             |             |
| Chlorophyll a (mg g <sup>-1</sup> )                                        | 7.12±0.44   | 2.88±0.34   | 4.97±0.43   | 4.11±0.54   | 5.45±0.52   |
| Chlorophyll b (mg g <sup>-1</sup> )                                        | 1.89±0.07   | 0.67±0.09   | 1.15±0.11   | 0.98±0.17   | 1.14±0.14   |
| Chl a: b ratio                                                             | 1.45±0.05   | 0.94±0.08   | 1.65±0.07   | 1.18±0.13   | 1.58±0.11   |
| Carotenoids (mg g <sup>-1</sup> )                                          | 3.75±0.12   | 4.37±0.14   | 4.34±0.1    | 4.38±0.19   | 4.89±0.16   |
| Fv/Fm                                                                      | 0.83±0      | 0.79±0.01   | 0.81±0.01   | 0.82±0.02   | 0.83±0      |
| <b>Standardized light</b>                                                  |             |             |             |             |             |
| Max photosynthesis (CO <sub>2</sub> μmol m <sup>-2</sup> s <sup>-1</sup> ) | 16.92±1.13  | 13.39±0.78  | 14.52±2.48  | 13.04±1.4   | 15.44±1.37  |
| Initial slope                                                              | 0.056±0.004 | 0.058±0.009 | 0.054±0.006 | 0.046±0.006 | 0.071±0.005 |
| Dark respiration (CO <sub>2</sub> μmol m <sup>-2</sup> s <sup>-1</sup> )   | -1.5±0.11   | -1.95±0.4   | -1.72±0.31  | -1.42±0.16  | -2.1±0.25   |
| Compensation point (PPFD μmol m <sup>-2</sup> s <sup>-1</sup> )            | 23±2        | 28.83±6.52  | 26.17±3.49  | 30±4.97     | 22.83±2.97  |
| <b>In-situ' light</b>                                                      |             |             |             |             |             |
| Max photosynthesis (CO <sub>2</sub> μmol m <sup>-2</sup> s <sup>-1</sup> ) | 9.12±0.47   | 9.82±1.93   | 12.62±0.87  | 10.27±1.82  | 9.73±2.83   |
| Initial slope                                                              | 0.044±0     | 0.064±0.01  | 0.073±0.003 | 0.059±0.009 | 0.07±0.021  |
| Dark respiration (CO <sub>2</sub> μmol m <sup>-2</sup> s <sup>-1</sup> )   | -1.9±0.05   | -1.42±0.26  | -1.61±0.3   | -1.31±0.26  | -1.9±0.41   |
| Compensation point (PPFD μmol m <sup>-2</sup> s <sup>-1</sup> )            | 35±0        | 21.67±2.53  | 19.17±3.57  | 19±2.24     | 21.17±3.39  |

Table S1 (continuation): Raw average values by measured trial for each treatment and specie. Plus minus values standard errors of these

| Factors                                                                 | Fix factors             | Random factors          |
|-------------------------------------------------------------------------|-------------------------|-------------------------|
| Variable                                                                | Light quality           | Specie                  |
| <b>Biomass and Morphology</b>                                           |                         |                         |
| Height (cm)                                                             | $< 2.2 \times 10^{-16}$ | $< 2.2 \times 10^{-16}$ |
| Dry weight leaves (g)                                                   | $3.54 \times 10^{-05}$  | $< 2.2 \times 10^{-16}$ |
| Dry weight shoot (g)                                                    | $1.67 \times 10^{-09}$  | $< 2.2 \times 10^{-16}$ |
| Dry weight roots (g)                                                    | $7.91 \times 10^{-08}$  | $< 2.2 \times 10^{-16}$ |
| Total dry weight                                                        | $4.95 \times 10^{-09}$  | $< 2.2 \times 10^{-16}$ |
| Root to Shoot ratio                                                     | $5.88 \times 10^{-07}$  | $< 2.2 \times 10^{-16}$ |
| SLA ( $\text{m}^2 \text{kg}^{-1}$ )                                     | 0.4753                  | $< 2.2 \times 10^{-16}$ |
| <b>Chlorophyll</b>                                                      |                         |                         |
| Chlorophyll a ( $\text{mg g}^{-1}$ )                                    | $5.73 \times 10^{-11}$  | $< 2.2 \times 10^{-16}$ |
| Chlorophyll b ( $\text{mg g}^{-1}$ )                                    | $8.51 \times 10^{-11}$  | $< 2.2 \times 10^{-16}$ |
| Chl a: b ratio                                                          | $2.37 \times 10^{-05}$  | $< 2.2 \times 10^{-16}$ |
| Carotenoids ( $\text{mg g}^{-1}$ )                                      | $7.59 \times 10^{-13}$  | $< 2.2 \times 10^{-16}$ |
| Fv/Fm                                                                   | $4.02 \times 10^{-08}$  | $< 2.2 \times 10^{-16}$ |
| <b>Standardized light</b>                                               |                         |                         |
| Max photosynthesis ( $\text{CO}_2 \mu\text{mol m}^{-2} \text{s}^{-1}$ ) | $3.73 \times 10^{-05}$  | $< 2.2 \times 10^{-16}$ |
| Initial slope                                                           | $2.54 \times 10^{-07}$  | $< 2.2 \times 10^{-16}$ |
| Dark respiration ( $\text{CO}_2 \mu\text{mol m}^{-2} \text{s}^{-1}$ )   | $< 2.2 \times 10^{-16}$ | $< 2.2 \times 10^{-16}$ |
| Compensation point (PPFD $\mu\text{mol m}^{-2} \text{s}^{-1}$ )         | 0.003218                | $< 2.2 \times 10^{-16}$ |
| <b>In-situ' light</b>                                                   |                         |                         |
| Max photosynthesis ( $\text{CO}_2 \mu\text{mol m}^{-2} \text{s}^{-1}$ ) | $5.66 \times 10^{-07}$  | $< 2.2 \times 10^{-16}$ |
| Initial slope                                                           | $8.14 \times 10^{-07}$  | $1.00 \times 10^{-04}$  |
| Dark respiration ( $\text{CO}_2 \mu\text{mol m}^{-2} \text{s}^{-1}$ )   | –                       | $< 2.2 \times 10^{-16}$ |
| Compensation point (PPFD $\mu\text{mol m}^{-2} \text{s}^{-1}$ )         | 0.003684                | $< 2.2 \times 10^{-16}$ |

Table S2: P-values for the different measured traits in both experiments using normalized data.



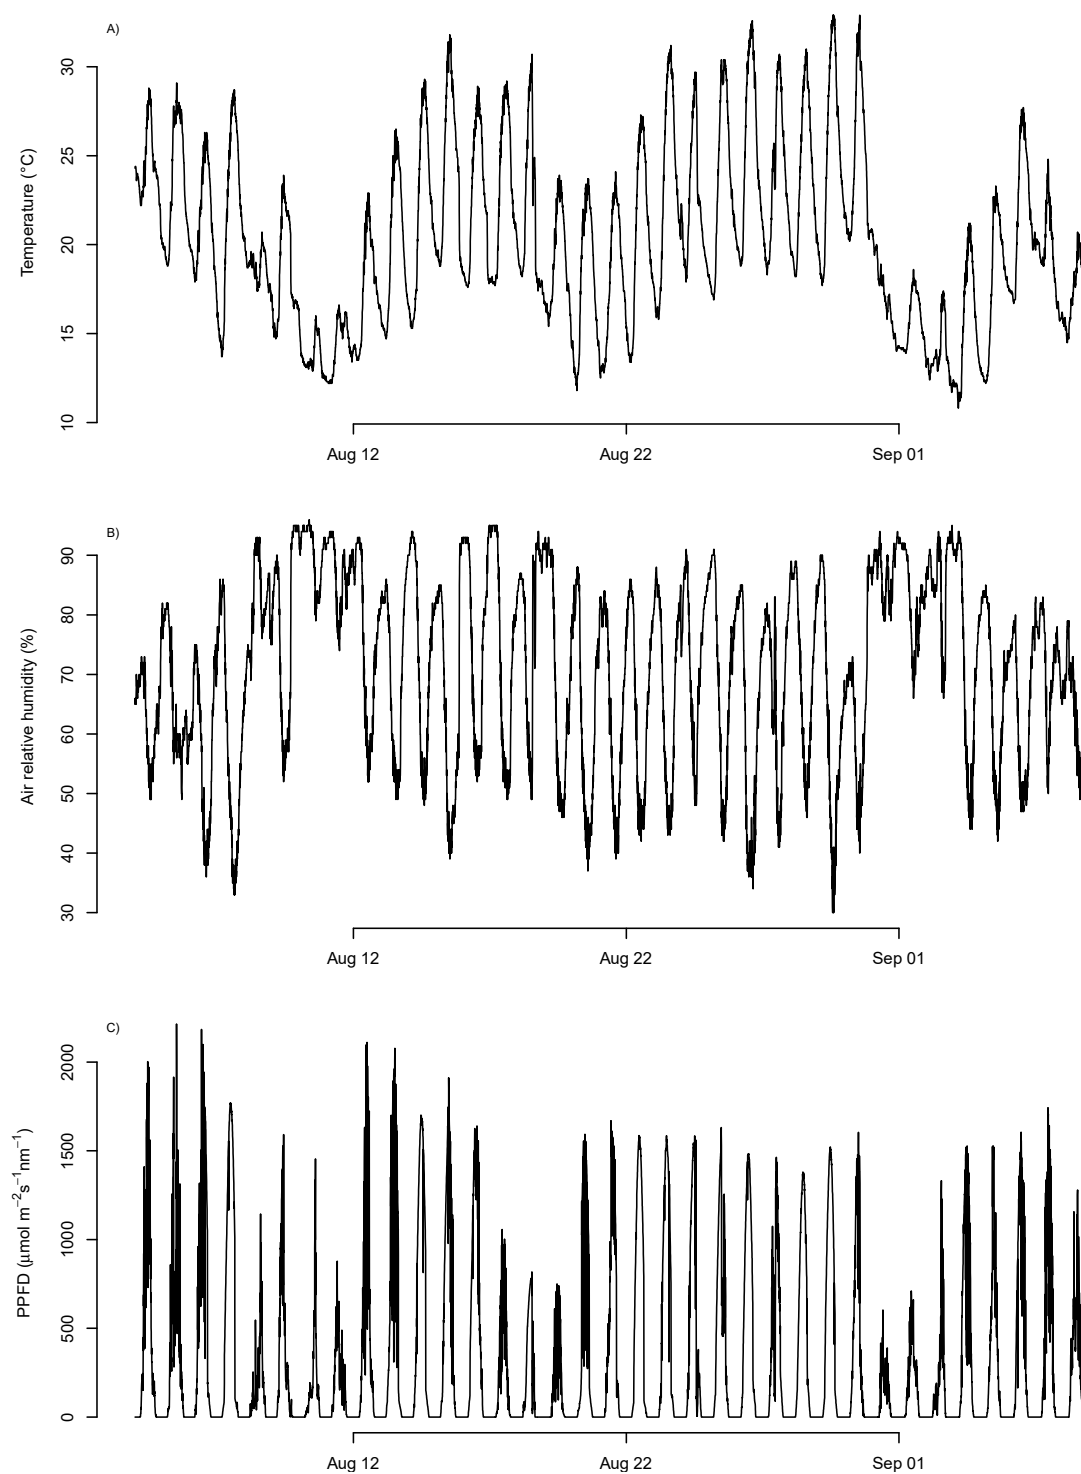

**Figure S2.** Environmental conditions of temperature (A), air relative humidity (B) and light intensity as PPFD (C) from the field trial at the botanical garden of the University of Basel, Switzerland.
